# Supplementary material for: In-Situ H2O2 Cleaning for Fouling Control of Manganese-Doped Ceramic Membrane through Confined Catalytic Oxidation Inside Membrane
Source: MDPI journal article supplement (doi:10.3390/membranes12010021), 2021-12-24
Supplement: s1 [file s1]

# In-Situ H<sub>2</sub>O<sub>2</sub> Cleaning for Fouling Control of Manganese-Doped Ceramic Membrane Through Confined Catalytic Oxidation Inside Membrane

Shengyin Tang <sup>1,2</sup>, Wanyi Fu <sup>1,\*</sup>, Tiantian Song <sup>1</sup>, Tianhao Tang <sup>1</sup>, Li Chen <sup>3</sup>, Jianning Guo <sup>4</sup>, Slav W. Hermanowicz <sup>2</sup> and Xihui Zhang <sup>1,3\*</sup>

<sup>1</sup> Tsinghua-Berkeley Shenzhen Institute, Tsinghua University, Shenzhen 518055, Guangdong, China

<sup>2</sup> Tsinghua Berkeley Shenzhen Institute, University of California, Berkeley, CA 94720, USA

<sup>3</sup> Tsinghua Shenzhen International Graduate School, Tsinghua University, Shenzhen 518055, Guangdong, China

<sup>4</sup> Institute of Information Technology, Shenzhen 518172, Guangdong, China

\* Correspondence: XZ, zhangxh@sz.tsinghua.edu.cn; WF, fu.wanyi@sz.tsinghua.edu.cn

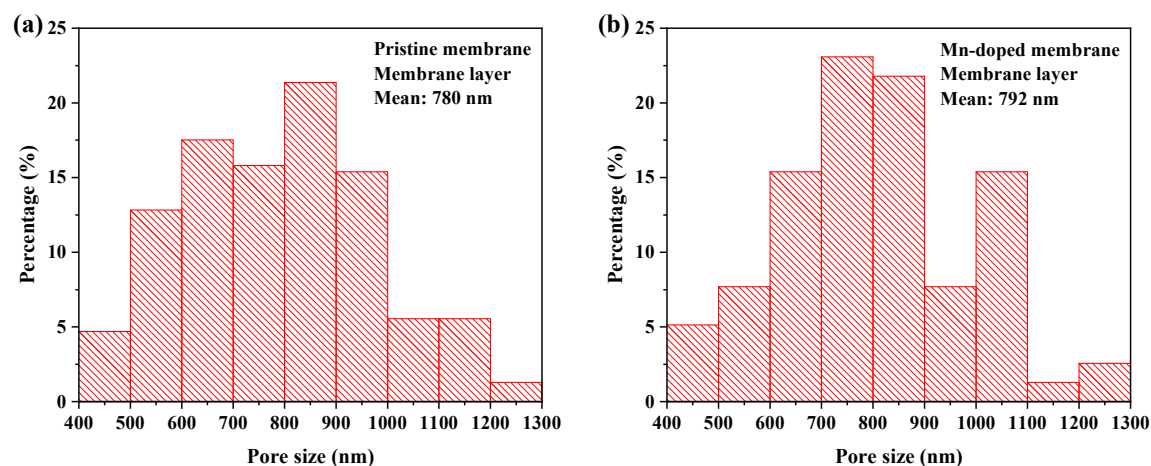

**Figure S1.** The pore size distribution of the (a) pristine and (b) Mn-doped membrane layers.

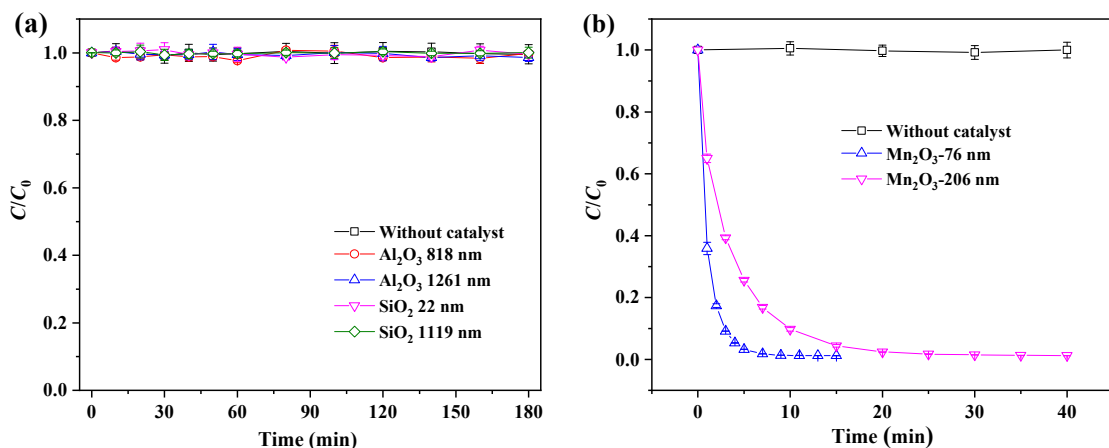

**Figure S2.** H<sub>2</sub>O<sub>2</sub> decomposition catalyzed by commercial metal oxide particles at neutral pH. (a) Al<sub>2</sub>O<sub>3</sub> or SiO<sub>2</sub>; (b) Mn oxides. (Operating conditions:  $C_0 = [\text{H}_2\text{O}_2]_0 = 1 \text{ mM}$ ;  $C$  is the concentration of H<sub>2</sub>O<sub>2</sub>;  $M_{\text{metal oxides}} = 1 \text{ g/L}$  except  $M_{\text{Mn oxides}} = 0.05 \text{ g/L}$ ; initial pH = 6.8-7.0)

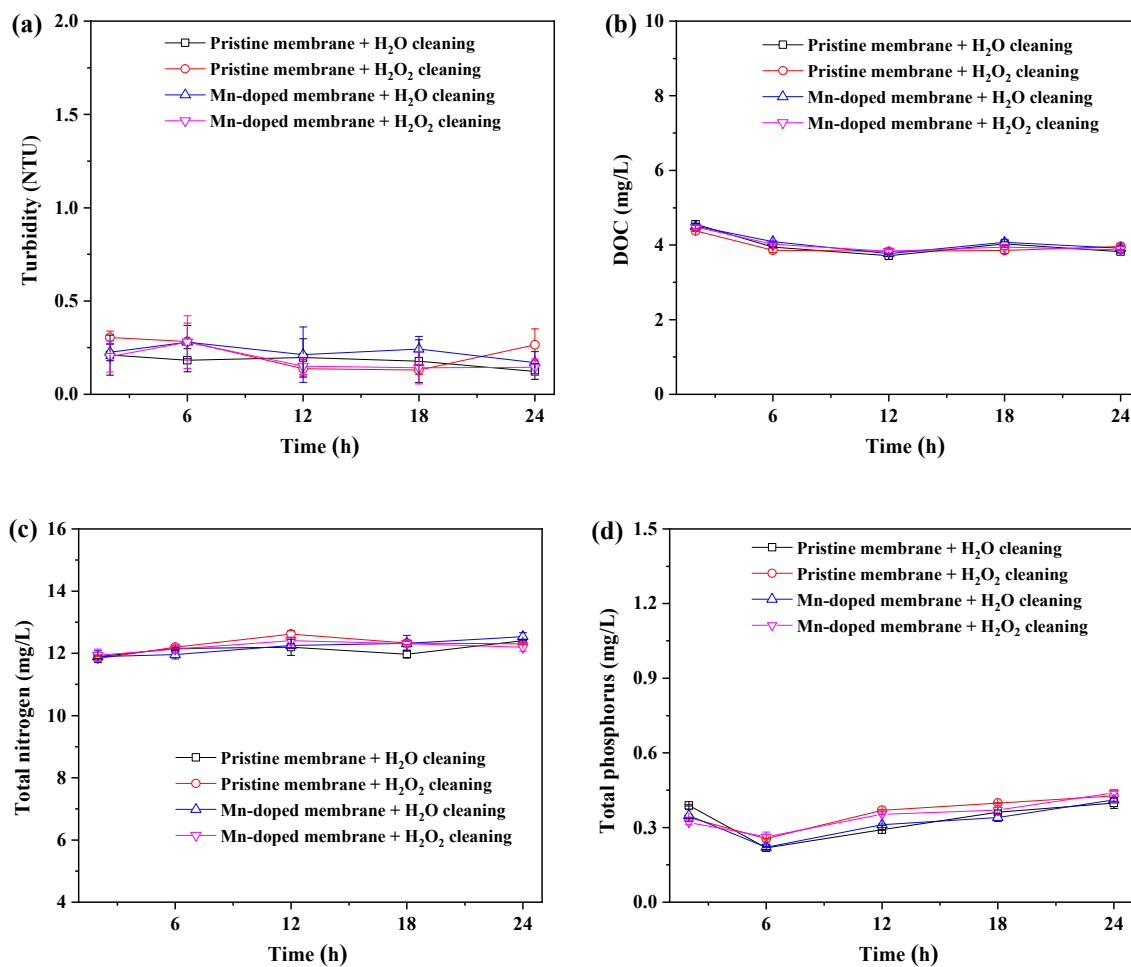

**Figure S3.** Water quality of the permeate when membranes were *in-situ* cleaned with H<sub>2</sub>O or H<sub>2</sub>O<sub>2</sub>. (a) Turbidity, (b) DOC, (c) total nitrogen, (d) total phosphorus.

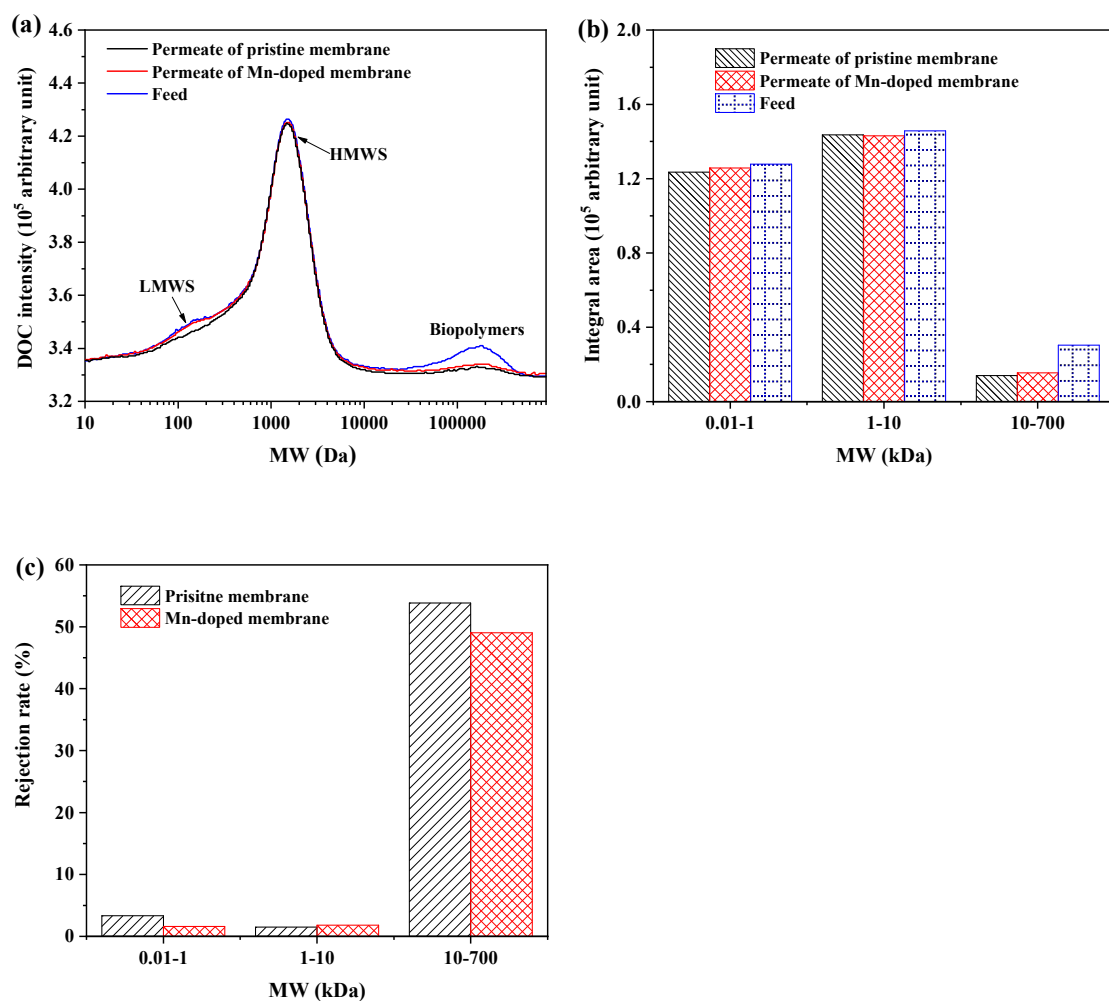

**Figure S4.** MW distribution of DOC in the feed and permeates during membrane filtration at flux of 60 LMH without backwash. (a) MW distribution of DOC; (b) integral area of different MW components; (c) rejection rates of different MW components by membranes.

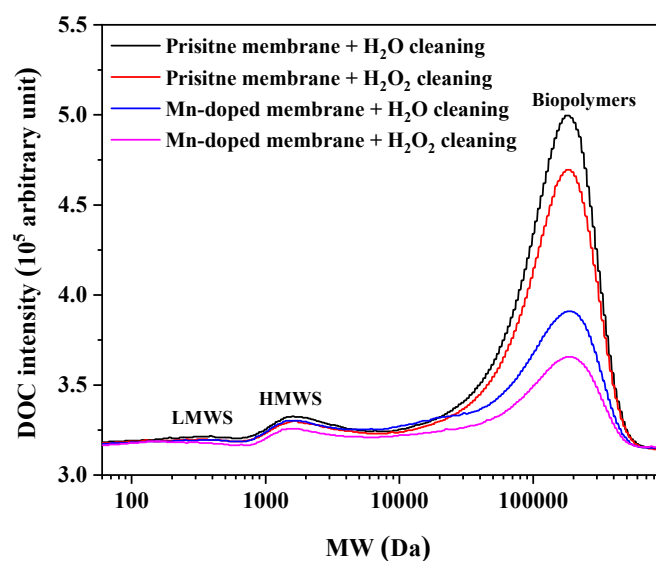

**Figure S5.** MW distribution of DOC in the physically removable fouling layer after 24 hours filtration.

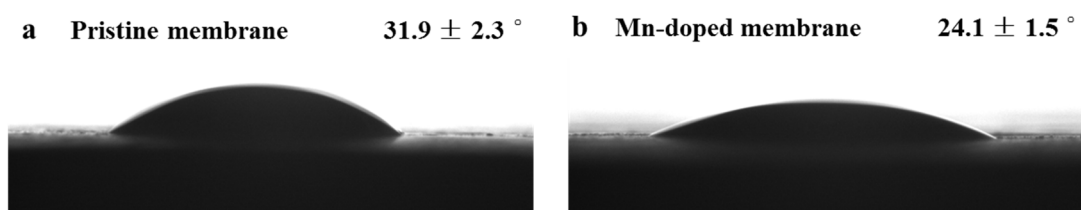

**Figure S6.** Pure water contact angles of the pristine (a) and Mn-doped membranes (b).

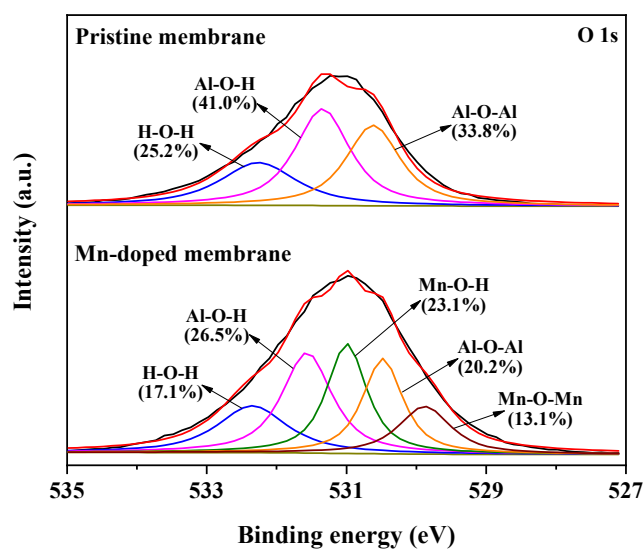

**Figure S7.** XPS spectra of O 1s of the pristine and Mn-doped ceramic membranes.

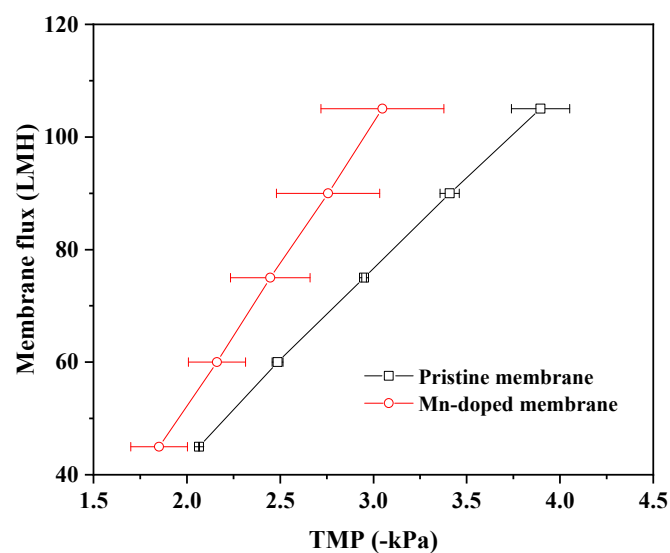

**Figure S8.** Pure water permeabilities of the pristine membrane and Mn-doped membrane.

**Table S1.** Mixed liquor properties after membrane filtration.

| Mixed liquor properties                | Pristine membrane + H <sub>2</sub> O cleaning | Pristine membrane + H <sub>2</sub> O <sub>2</sub> cleaning | Mn-doped membrane + H <sub>2</sub> O cleaning | Mn-doped membrane + H <sub>2</sub> O <sub>2</sub> cleaning |
|----------------------------------------|-----------------------------------------------|------------------------------------------------------------|-----------------------------------------------|------------------------------------------------------------|
| DOC (mg/L)                             | 5.5 ± 0.2                                     | 5.5 ± 0.1                                                  | 5.7 ± 0.3                                     | 5.6 ± 0.2                                                  |
| MLSS (g/L)                             | 7.2 ± 0.1                                     | 7.1 ± 0.2                                                  | 7.1 ± 0.2                                     | 7.0 ± 0.1                                                  |
| SV <sub>30</sub> (%)                   | 39.0 ± 1.4                                    | 38.8 ± 1.8                                                 | 39.3 ± 1.1                                    | 39.1 ± 0.6                                                 |
| Zeta potential (mV)                    | -12.1 ± 0.8                                   | -12.0 ± 0.7                                                | -12.1 ± 0.3                                   | -11.9 ± 0.3                                                |
| SOUR (mg O <sub>2</sub> /(g MLSS*min)) | 0.1338 ± 0.0110                               | 0.1326 ± 0.0008                                            | 0.1340 ± 0.0122                               | 0.1432 ± 0.0025                                            |
| pH                                     | 6.9 ± 0.1                                     | 7.0 ± 0.1                                                  | 6.9 ± 0.1                                     | 7.1 ± 0.1                                                  |
